# Supplementary material
Source: ML conference proceedings conference paper supplement (https://proceedings.neurips.cc/paper_files/paper/2015/hash/4a08142c38dbe374195d41c04562d9f8-Abstract.html)
Supplement: Supplementary file [file 4a08142c38dbe374195d41c04562d9f8-Supplemental.zip]

## A Normalizable distributions

*Proof of Proposition 1 (distributions close to normalizable sets are approximately normalizable).*

Let  $T(x, y) = T^*(x, y) + T^-(x, y)$ , where  $T^*(x, y) = \arg \min_{T(x, y): x \in \mathcal{S}} \|T(X, y) - T(x, y)\|_2$ .

Then,

$$\begin{aligned} \mathbb{E} \left( \log \left( \int e^{\eta^\top T(X, y)} dy \right) \right)^2 &= \mathbb{E} \left( \log \left( \int e^{\eta^\top (T^*(X, y) + T^-(X, y))} dy \right) \right)^2 \\ &\leq \mathbb{E} \left( \log \left( e^{\eta^\top \tilde{T}} \int e^{\eta^\top T^*(X, y)} dy \right) \right)^2 \end{aligned}$$

for  $\tilde{T} = \arg \max_{T(X, y)} \|\eta^\top T(X, y)\|_2$ ,

$$\begin{aligned} &\leq \mathbb{E} \left( \log \left( e^{\eta^\top \tilde{T}} \right) \right)^2 \\ &= (DB)^2 \end{aligned}$$

□

## B Normalization and likelihood

### B.1 General bound

**Lemma 5.** *If  $\|\eta\|_2 \leq \delta/R$ , then  $p_\eta(y|x)$  is  $\delta$ -approximately normalized about  $\log \mu(\mathcal{Y})$ .*

*Proof.* If  $\int e^{\eta^\top T(X, y)} d\mu(y) \geq \log \mu(\mathcal{Y})$ ,

$$\begin{aligned} \left( \log \int_{\mathcal{Y}} e^{\eta^\top T(X, y)} d\mu(y) - \log \mu(\mathcal{Y}) \right)^2 &\leq \left( \log \int_{\mathcal{Y}} e^{\|\eta\|_2 R} d\mu(y) - \log \mu(\mathcal{Y}) \right)^2 \\ &= \|\eta\|_2^2 R^2 \\ &\leq \delta^2 \end{aligned}$$

The case where  $\int e^{\eta^\top T(X, y)} d\mu(y) \leq \log \mu(\mathcal{Y})$  is analogous, instead replacing  $\eta^\top T(x, y)$  with  $-\|\eta\|_2 R$ . The variance result follows from the fact that every log-partition is within  $\delta$  of the mean. □

*Proof of Theorem 2 (loss of likelihood is bounded in terms of distance from uniform).* Consider the likelihood evaluated at  $\alpha\hat{\eta}$ , where  $\alpha = \delta/R\|\hat{\eta}\|_2$ . We know that  $0 \leq \alpha \leq 1$  (if  $\delta > R\eta$ , then the MLE already satisfying the normalizing constraint). Additionally,  $p_{\alpha\hat{\eta}}(y|x)$  is  $\delta$ -approximately normalized. (Both follow from Lemma 5.)

Then,

$$\begin{aligned} \Delta_\ell &= \frac{1}{n} \sum_i [(\hat{\eta}^\top T(x_i, y_i) - A(x_i, \hat{\eta})) - (\alpha\hat{\eta}^\top T(x_i, y_i) - A(x_i, \alpha\hat{\eta}))] \\ &= \frac{1}{n} \sum_i [(1 - \alpha)\hat{\eta}^\top T(x_i, y_i) - A(x_i, \hat{\eta}) + A(x_i, \alpha\hat{\eta})] \end{aligned}$$

Because  $A(x, \alpha\eta)$  is convex in  $\alpha$ ,

$$\begin{aligned} A(x_i, \alpha\hat{\eta}) &\leq (1 - \alpha)A(x_i, \mathbf{0}) + \alpha A(x_i, \hat{\eta}) \\ &= (1 - \alpha)\mu(\mathcal{Y}) + \alpha A(x_i, \hat{\eta}) \end{aligned}$$

Thus,

$$\begin{aligned}
\Delta_\ell &= \frac{1}{n} \sum_i [(1 - \alpha) \hat{\eta}^\top T(x_i, y_i) - A(x_i, \hat{\eta}) + (1 - \alpha) \log \mu(\mathcal{Y}) + \alpha A(x_i, \hat{\eta})] \\
&= (1 - \alpha) \frac{1}{n} \sum_i [\hat{\eta}^\top T(x_i, y_i) - A(x_i, \hat{\eta}) + \log \mu(\mathcal{Y})] \\
&= (1 - \alpha) \frac{1}{n} \sum_i [\log p_\eta(y|x) - \log \text{Unif}(y)] \\
&\asymp (1 - \alpha) \mathbb{E} \text{KL}(p_\eta(\cdot|X) \parallel \text{Unif}) \\
&\leq \left(1 - \frac{\delta}{R \|\hat{\eta}\|_2}\right) \mathbb{E} \text{KL}(p_\eta(\cdot|X) \parallel \text{Unif}) \quad \square
\end{aligned}$$

## B.2 All-nonuniform bound

We make the following assumptions:

- Labels  $y$  are discrete. That is,  $\mathcal{Y} = \{1, 2, \dots, k\}$  for some  $k$ .
- $x \in \mathcal{H}(d)$ . That is, each  $x$  is a  $\{0, 1\}$  indicator vector drawn from the Boolean hypercube in  $q$  dimensions.
- Joint feature vectors  $T(x, y)$  are just the features of  $x$  conjoined with the label  $y$ . Then it is possible to think of  $\eta$  as a sequence of vectors, one per class, and we can write  $\eta^\top T(x, y) = \eta_y^\top x$ .
- As in the body text, let all MLE predictions be nonuniform, and in particular let each  $\hat{\eta}_{y^*}^\top x - \hat{\eta}_y^\top x > c \|\hat{\eta}\|$  for  $y \neq y^*$ .

**Lemma 6.** *For a fixed  $x$ , the maximum covariance between any two features  $x_i$  and  $x_j$  under the model evaluated at some  $\eta$  in the direction of the MLE:*

$$\text{Cov}[T(X, Y)_i, T(X, Y)_j | X = x] \leq 2(k - 1)e^{-c\delta} \quad (12)$$

*Proof.* If either  $i$  or  $j$  is not associated with the class  $y$ , or associated with a zero element of  $x$ , then the associated feature (and thus the covariance at  $(i, j)$ ) is identically zero. Thus we assume that  $i$  and  $j$  are both associated with  $y$  and correspond to nonzero elements of  $x$ .

$$\text{Cov}[T_i, T_j | X = x] = \sum_y p_\eta(y|x) - p_\eta(y|x)^2$$

Suppose  $y$  is the majority class. Then,

$$\begin{aligned}
p_\eta(y|x) - p_\eta(y|x)^2 &= \frac{e^{\eta_y^\top x}}{\sum_{y'} e^{\eta_{y'}^\top x}} - \frac{e^{2\eta_y^\top x}}{\left(\sum_{y'} e^{\eta_{y'}^\top x}\right)^2} \\
&= \frac{e^{\eta_y^\top x} \left(\sum_{y'} e^{\eta_{y'}^\top x}\right) - e^{2\eta_y^\top x}}{\left(\sum_{y'} e^{\eta_{y'}^\top x}\right)^2} \\
&\leq \frac{e^{\eta_y^\top x} \left(\sum_{y'} e^{\eta_{y'}^\top x}\right) - e^{2\eta_y^\top x}}{e^{2\eta_y^\top x}} \\
&= \sum_{y' \neq y} e^{(\eta_{y'} - \eta_y)^\top x} \\
&\leq (k - 1)e^{-c\|\eta\|}
\end{aligned}$$

Now suppose  $y$  is not in the majority class. Then,

$$\begin{aligned} p_\eta(y|x) - p_\eta(y|x)^2 &\leq p(y|x) \\ &= \frac{e^{\eta_y^\top x}}{\sum_{y'} e^{\eta_{y'}^\top x}} \\ &\leq e^{-c\|\eta\|} \end{aligned}$$

Thus the covariance

$$\sum_y p_\eta(y|x) - p_\eta(y|x)^2 \leq 2(k-1)e^{-c\|\eta\|}$$

□

**Lemma 7.** Suppose  $\eta = \beta\hat{\eta}$  for some  $\beta < 1$ . Then for a sequence of observations  $(x_1, \dots, x_n)$ , under the model evaluated at  $\xi$ , the largest eigenvalue of the feature covariance matrix

$$\frac{1}{n} \sum_i [\mathbb{E}_\xi[TT^\top | X = x_i] - (\mathbb{E}_\theta[T | X = x_i])(\mathbb{E}_\xi[T | X = x_i])^\top] \quad (13)$$

is at most

$$q(k-1)e^{-c\beta\|\hat{\eta}\|} \quad (14)$$

*Proof.* From Lemma 6, each entry in the covariance matrix is at most  $(k-1)e^{-c\|\eta\|} = (k-1)e^{-c\beta\|\hat{\eta}\|}$ . At most  $q$  features are nonzero active in any row of the matrix. Thus by Gershgorin's theorem, the maximum eigenvalue of each term in Equation 13 is  $q(k-1)e^{-c\beta\|\hat{\eta}\|}$ , which is also an upper bound on the sum. □

*Proof of Proposition 3 (loss of likelihood goes as  $e^{-\delta}$ ).* As before, let us choose  $\hat{\eta}_\delta = \alpha\hat{\eta}$ , with  $\alpha = \delta/R\|\hat{\eta}\|_2$ . We have already seen that this choice of parameter is normalizing.

Taking a second-order Taylor expansion about  $\eta$ , we have

$$\begin{aligned} \log p_{\hat{\eta}_\delta}(y|x) &= \log p_\eta(y|x) + (\hat{\eta}_\delta - \hat{\eta})^\top \nabla \log p_\eta(y|x) + (\hat{\eta}_\delta - \hat{\eta})^\top \nabla \nabla^\top \log p_\eta(y|x) (\hat{\eta}_\delta - \hat{\eta}) \\ &= \log p_{\hat{\eta}}(y|x) + (\hat{\eta}_\delta - \hat{\eta})^\top \nabla \nabla^\top \log p_\eta(y|x) (\hat{\eta}_\delta - \hat{\eta}) \end{aligned}$$

where the first-order term vanishes because  $\hat{\eta}$  is the MLE. It is a standard result for exponential families that the Hessian in the second-order term is just Equation 13. Thus we can write

$$\begin{aligned} &\geq \log p_{\hat{\eta}}(y|x) - \|\hat{\eta}_\delta - \hat{\eta}\|^2 q(k-1)e^{-c\beta\|\eta\|} \\ &\geq \log p_{\hat{\eta}}(y|x) - (1-\alpha)^2 \|\hat{\eta}\|^2 q(k-1)e^{-c\alpha\|\eta\|} \\ &= \log p_{\hat{\eta}}(y|x) - (\|\hat{\eta}\| - \delta/R)^2 q(k-1)e^{-c\delta/R} \end{aligned}$$

The proposition follows. □

## C Variance lower bound

Let

$$U_0 = \{\beta \in \mathbb{R}^{Kd} : \exists \tilde{\beta} \in \mathbb{R}^d, \beta_{kj} = \tilde{\beta}_j, 1 \leq k \leq K, 1 \leq j \leq d\}.$$

**Lemma 8.** If  $\text{span}(\mathcal{X}) = \mathbb{R}^d$ , then equivalence of natural parameters is characterized by

$$\eta \sim \eta' \iff \eta - \eta' \in U_0.$$

*Proof.* For  $x \in \mathcal{X}$ , denote by  $P_\eta(x) \in \Delta_K$  the distribution over  $\mathcal{Y}$ . Now, suppose that  $\eta \sim \eta'$  and fix  $x \in \mathcal{X}$ . By the definition of equivalence, we have

$$\frac{P_\eta(x)_k}{P_\eta(x)_{k'}} = \frac{P_{\eta'}(x)_k}{P_{\eta'}(x)_{k'}},$$

which immediately implies

$$(\eta_k - \eta_{k'})^T x = (\eta'_k - \eta'_{k'})^T x,$$

whence

$$[(\eta_k - \eta'_k) - (\eta_{k'} - \eta'_{k'})]^T x = 0.$$

Since this holds for all  $x \in \mathcal{X}$  and  $\text{span}(\mathcal{X}) = \mathbb{R}^d$ , we get

$$\eta_k - \eta'_k = \eta_{k'} - \eta'_{k'}.$$

That is, if we define

$$\tilde{\beta}_j = \eta_{1j} - \eta'_{1j},$$

we get

$$\eta_{kj} - \eta'_{kj} = \eta_{1d} - \eta'_{1d} = \tilde{\beta}_j,$$

and  $\eta - \eta' \in U_0$ , as required.

Conversely, if  $\eta - \eta' \in U_0$ , choose an appropriate  $\tilde{\beta}$ . We then get

$$\eta_k^T x = (\eta')^T x + \tilde{\beta}^T x.$$

It follows that

$$A(\eta', x) = A(\eta, x) + \tilde{\beta}^T x,$$

so that

$$\eta^T T(k, x) - A(\eta, x) = (\eta')^T x + \tilde{\beta}^T x - [A(\eta', x) + \tilde{\beta}^T x] = (\eta')^T x - A(\eta', x)$$

and the claim follows.  $\square$

The key tool we use to prove the theorem reinterprets  $V^*(\eta)$  as the norm of an orthogonal projection. We believe this may be of independent interest. To set it up, let  $\mathcal{S} = L^2(Q, \mathbb{R}^D)$  be the Hilbert space of square-integrable functions with respect to the input distribution  $p(x)$ , define

$$w_j(x) = x_j - \mathbb{E}_{p(x)}[X_j]$$

and

$$\mathcal{C} = \text{span}(w_j)_{1 \leq j \leq d}.$$

We then have

**Lemma 9.** *Let  $\tilde{A}(\eta, x) = A(\eta, x) - \mathbb{E}_{p(x)}[A(\eta, X)]$ . Then*

$$V^*(\eta) = \left\| \tilde{A}(\eta, \cdot) - \Pi_{\mathcal{C}} \tilde{A}(\eta, \cdot) \right\|_2^2.$$

The second key observation, which we again believe is of independent interest, is that under certain circumstances, we can completely replace the normalizer  $A(\eta, \cdot)$  by  $\max_{y \in \mathcal{Y}} \eta^T T(y, x)$ . For this, we define

$$E_\infty(\eta)(x) = \max_k \eta^T T(k, x) = \max_k \eta_k^T x$$

and correspondingly let  $\bar{E}_\infty(\eta) = \mathbb{E}_{p(x)}[E_\infty(\eta)(x)]$ .

*Proof.* By Lemma 8, we have

$$V^*(\eta) = \inf_{\beta \in \mathbb{R}^d} \int_{\mathbb{R}^{Kd}} [A(\eta, x) - \bar{A}(\eta) - (\beta^T x - \beta^T \mathbb{E}_{p(x)}[X])]^2 dp(x).$$

But now, we observe that this can be rewritten with the aid of the isomorphism  $\mathbb{R}^d \simeq \mathcal{C}$  defined by the identity

$$\beta^T x - \beta^T \mathbb{E}_{p(x)}[X] = \sum_j \beta_j w_j(x)$$

to read

$$V^*(\eta) = \inf_{f \in \mathcal{C}} \int_{\mathbb{R}^d} [A(\eta, x) - \bar{A}(\eta) - f]^2 dp(x) = \left\| \tilde{A}(\eta, \cdot) - \Pi_{\mathcal{C}} \tilde{A}(\eta, \cdot) \right\|_2^2,$$

as required.  $\square$

**Lemma 10.** Suppose for each  $x \in \mathcal{X}$ , there is a unique  $k^* = k^*(x)$  such that  $k^*(x) = \arg \max_k \eta_k^T x$  and such that for  $k \neq k^*$ ,  $\eta_k^T x \leq \eta_{k^*}^T x - \Delta$  for some  $\Delta > 0$ . Then

$$\sup_{x \in \mathcal{X}} |A(\eta, x) - \bar{A}(\eta) - [E_\infty(\eta)(x) - \bar{E}_\infty(\eta)]| \leq K e^{-\Delta \alpha}.$$

*Proof.* Denote by  $\tilde{E}_\infty$  the centered version of  $E_\infty$ . Using the identity  $1 + t \leq e^t$ , we immediately see that

$$E_\infty(\alpha \eta)(x) \leq A(\alpha \eta, x) = \alpha E_\infty(\eta)(x) + \log \left( 1 + \sum_{k \neq k^*(x)} e^{[\eta_k^T x - E_\infty(\eta)(x)]} \right) \leq E_\infty(\alpha \eta)(x) + K e^{-\Delta \alpha}.$$

It follows that

$$\mathbb{E}_{p(x)} [E_\infty(\alpha \eta)(X)] \leq \mathbb{E}_{p(x)} [A(\alpha \eta, X)] \leq \mathbb{E}_{p(x)} [E_\infty(\alpha \eta)(X)] + K e^{-\Delta \alpha}.$$

We thus have

$$-K e^{-\Delta \alpha} \leq \tilde{A}(\alpha \eta, x) - \tilde{E}_\infty(\alpha \eta)(x) \leq K e^{-\Delta \alpha}, \quad x \in \mathcal{X}.$$

The claim follows.  $\square$

If we let

$$V_E^*(\eta) = \inf_{\eta' \sim \eta} \text{Var}_{p(x)} [\tilde{E}_\infty(\eta', X)].$$

**Corollary 11.** For  $\alpha > \frac{\log 2K}{\Delta}$ , we have

$$V^*(\alpha \eta) \geq V_E^*(\eta) \alpha^2 - (1 + V_E^*(\eta)) \alpha.$$

*Proof.* For this, observe first that if  $\eta' \sim \eta$ , then

$$\tilde{A}(\eta', x)^2 \geq \tilde{E}_\infty(\alpha \eta')(x)^2 - 2 \left| \tilde{E}_\infty(\alpha \eta')(x) \right| \left| \tilde{A}(\eta', x) - \tilde{E}_\infty(\eta')(x) \right|.$$

By linearity of  $E_\infty(\eta')$  in its  $\eta$  argument, and by Lemma 10, we therefore deduce

$$\tilde{A}(\eta', x)^2 \geq \tilde{E}_\infty(\eta')(x)^2 \alpha^2 - 2K e^{-\Delta \alpha} \left| \tilde{E}_\infty(\eta')(x) \right| \alpha.$$

Then using the inequality  $\mathbb{E}_{p(x)} [|f(X)|] \leq 1 + \text{Var}_{p(x)} [f(X)]$ , valid for any  $f \in L^2(Q, \mathbb{R}^D)$  with  $\mathbb{E}_{p(x)} [f] = 0$ , we thus deduce

$$\text{Var}_{p(x)} [A(\alpha \eta', X)] \geq \text{Var}_{p(x)} [E_\infty(\eta')(X)] \alpha^2 - 2K e^{-\Delta \alpha} (1 + \text{Var}_{p(x)} [E_\infty(\eta')(X)]) \alpha.$$

Taking the infimum over both sides, we get

$$V^*(\eta) \geq V_E^*(\eta) - 2K e^{-\Delta \alpha} (1 + V_E^*(\eta)) \alpha.$$

$\square$

We are now prepared to give the explicit example. It is defined by  $\eta_k = 0$  if  $k > 2$  and

$$\eta_{1j} = \begin{cases} -a & \text{if } d = 1, \\ \frac{a}{d-1} & \text{o.w.} \end{cases} \quad (15)$$

and for all  $j$ ,

$$\eta_{2j} = \frac{a}{d(d-1)}, \quad (16)$$

where

$$a = \sqrt{1 - \frac{1}{d}}.$$

For convenience, also define

$$b(x) = \sum_d x_d$$

and observe that

$$E_\infty(\eta)(x) = \begin{cases} \frac{ab(x)}{d(d-1)} & \text{if } x_j = 1, \\ \frac{ab(x)}{d-1} & \text{o.w.} \end{cases},$$

Our goal will be to prove that

$$1 \geq V_E^*(\eta) \geq \frac{1}{32d(d-1)}.$$

The claim will then follow by the above corollary.

To see that  $V_E^*(\eta) \leq 1$ , we simply note that

$$\max_k |\eta_k^T x| \leq a < 1,$$

whence  $\text{Var}_{p(x)} [\eta^T x] \leq 1$  as well and we are done.

The other direction requires more work. To prove it, we first prove the following lemma

**Lemma 12.** *With  $\eta$  defined as in (15)-(16), we have*

$$\inf_{\eta' \sim \eta} \mathbb{E}_{p(x)} [E_\infty(\eta')(X)^2] \geq \frac{1}{16d(d-1)}.$$

*Proof.* Suppose  $\eta_k - \eta'_k = \beta \in \mathbb{R}^d$ . We can then write

$$\inf_{\eta' \sim \eta} \mathbb{E}_{p(x)} [E_\infty(\eta')(X)^2] = \inf_{\beta \in \mathbb{R}^d} \frac{1}{2^d} \sum_{x \in \mathcal{H}} \sum_{x \in \mathcal{H}} [E_\infty(\eta)(x) - \beta^T x]^2$$

and we therefore define

$$\begin{aligned} \mathcal{L}(\beta) &= \sum_{x \in \mathcal{H}} \sum_{x \in \mathcal{H}} [E_\infty(\eta)(x) - \beta^T x]^2 \\ &= \sum_{x: x_1=0} \left[ \left( \beta_1 + \beta^T x - \frac{a}{d(d-1)} \right)^2 + \left( \frac{ab(x)}{d-1} - \beta^T x \right)^2 \right], \end{aligned}$$

noting that

$$\inf \mathcal{L} = 2^d \cdot \inf_{\eta' \sim \eta} \mathbb{E}_{p(x)} [E_\infty(\eta')(X)^2].$$

We therefore need to prove

$$\mathcal{L} \geq \frac{2^{d-4}}{d(d-1)}.$$

Holding  $\beta_{2:d}$  fixed, we note that the optimal setting of  $\beta_1$  is given by

$$\beta_1 = -\frac{1}{2} \sum_{j \geq 2} \beta_j + \frac{a}{d(d-1)}.$$

We can therefore work with the objective

$$\mathcal{L}(\beta) = \sum_{x: x_1=0} \left[ \frac{(\beta^T x - \beta^T x^\neg)^2}{4} + \left( \frac{ab(x)}{d-1} - \beta^T x \right)^2 \right],$$

where we have defined

$$x_j^\neg = \begin{cases} 0 & \text{if } j = 1, \\ 1 - x_j & \text{o.w.} \end{cases}$$

Grouping into  $\{x, x^\neg\}$  pairs, we end up with

$$\mathcal{L}(\beta_{2:d}) = \sum_{x: x_1=x_2=0} \left[ \frac{(\beta^T x - \beta^T x^\neg)^2}{2} + \left( \frac{ab(x)}{d-1} - \beta^T x \right)^2 + \left( \frac{ab(x^\neg)}{d-1} - \beta^T x^\neg \right)^2 \right]$$

Now, supposing  $b(x) \leq \frac{d-1}{2} - \frac{3}{2}$  or  $b(x) \geq \frac{D-1}{2} + \frac{3}{2}$ , we have

$$|b(x^\neg) - b(x)| = |d-1-2b(x)| \geq 3.$$

We will bound the terms that satisfy this property. Indeed, supposing we fix such an  $x$ , at least one of the following must be true: either

$$\max \left( \left( \frac{ab(x)}{d-1} - \beta^T x \right)^2, \left( \frac{ab(x^\neg)}{d-1} - \beta^T x^\neg \right)^2 \right) \geq \frac{a^2}{(d-1)^2},$$

or

$$(\beta^T x - \beta^T x^\neg)^2 \geq \frac{a^2}{(d-1)^2}.$$

Indeed, suppose the first condition does not hold. Then necessarily

$$\left| \frac{ab(x)}{d-1} - \beta^T x \right| < \frac{a}{d-1}$$

and

$$\left| \frac{ab(x^\neg)}{d-1} - \beta^T x^\neg \right| < \frac{a}{d-1},$$

so that

$$\frac{a(b(x)-1)}{d-1} \leq \beta^T x \leq \frac{a(b(x)+1)}{d-1}$$

and

$$\frac{a(b(x^\neg)-1)}{d-1} \leq \beta^T x^\neg \leq \frac{a(b(x^\neg)+1)}{d-1}.$$

Now, if  $b(x) \geq b(x^\neg) + 3$ , this immediately implies

$$\beta^T x - \beta^T x^\neg \geq \frac{a}{d-1}$$

and, symmetrically, if  $b(x^\neg) \geq b(x) + 3$ , we get

$$\beta^T x^\neg - \beta^T x \geq \frac{a}{d-1}.$$

Either way, the second inequality holds, whence the claim. Since there are at least  $2^{d-1} - \frac{3 \cdot 2^d}{\sqrt{\frac{3d}{2}+1}} \geq 2^{d-2}$  choices of  $x$  satisfying the requirements of our line of reasoning, we get  $2^{d-3}$  pairs, whence

$$\mathcal{L}(\beta_{2:d}) \geq \frac{2^{d-4}a^2}{(d-1)^2} = \frac{2^{d-4}}{d(d-1)},$$

as claimed.  $\square$

We can apply this lemma to derive a variance bound, viz.

**Lemma 13.** *With  $\eta$  as in (15)-(16), we have*

$$V_E^*(\eta) \geq \frac{1}{32d(d-1)}.$$

*Proof.* For this, observe that, with  $\eta'$  being the value corresponding to  $\eta'_k - \eta_k = \beta$ , we have

$$V_E^*(\eta) = \inf_{\beta} \frac{1}{2^d} \sum_{x \in \mathcal{H}} \tilde{E}_\infty(\eta')(x)^2 \geq \inf_{\beta} \frac{1}{2^d} \sum_{x \in \mathcal{H}: x_1=1} \tilde{E}_\infty(\eta')(x)^2.$$

Applying the previous result to the  $(D-1)$ -dimensional hypercube on which  $x_1 = 1$ , we deduce

$$V_E^*(\eta) \geq \frac{1}{2} \cdot \frac{1}{16(d-1)(d-2)} = \frac{1}{32(d-1)(d-2)} \geq \frac{1}{32d(d-1)}.$$

$\square$

*Proof of Theorem 4 from Lemma 13.* Putting everything together, we see first that

$$V^*(\alpha\eta) \geq V_E^*(\eta)\alpha^2 - 4e^{-\Delta\alpha}\alpha,$$

where  $\Delta = \frac{\sqrt{1-\frac{1}{d}}}{2(d-1)}$ . But then this implies

$$V^*(\alpha\eta) \geq \frac{\alpha^2}{32d(d-1)} - 4e^{-\Delta\alpha}\alpha.$$

On the other hand,  $\|\eta\|_2^2 \leq 2$ , so  $\alpha^2 = \frac{\|\alpha\eta\|_2^2}{\|\eta\|_2^2} \geq \frac{\|\alpha\eta\|_2^2}{2}$ , whence

$$V^*(\alpha\eta) \geq \frac{\|\alpha\eta\|_2^2}{64d(d-1)} - 4e^{-\frac{\sqrt{1-\frac{1}{d}}\|\alpha\eta\|_2}{2(d-1)}}\|\alpha\eta\|_2,$$

which is the desired result. □
